# Supplementary material for: Electrocatalytic Assisted Performance Enhancement for the Na-S Battery in Nitrogen-Doped Carbon Nanospheres Loaded with Fe
Source: PubMed Central journal article supplement (PMC7180711; doi:10.3390/molecules25071585), 2020-03-30
Supplement: molecules-25-01585-s001.pdf [file molecules-25-01585-s001.pdf]

**Supporting information**

**Electrocatalytic assisted performance enhancement  
for Na-S battery in nitrogen-doped carbon  
nanospheres loaded with Fe**

Jianhui Zhu <sup>a,b</sup>, Amr Abdelkader <sup>c</sup>, Denisa Demko <sup>d</sup>, Libo Deng <sup>\*a</sup>, Peixin Zhang <sup>\*a,b</sup>,  
Tingshu He <sup>b</sup>, Yanyi Wang <sup>a,b</sup> and Licong Huang <sup>a</sup>

<sup>a</sup> College of Chemistry and Environmental Engineering, Shenzhen University,  
Shenzhen 518060, China

<sup>b</sup> College of Materials Science and Engineering, Xi'an University of  
Architecture and Technology, Xi'an, Shannxi 710055, PR China

<sup>c</sup> Department of Design and Engineering, Faculty of Science & Technology,  
Bournemouth University, Poole, Dorset BH12 5BB, United Kingdom

<sup>d</sup> Department of Engineering, University of Cambridge, Cambridge CB3 0FS,  
United Kingdom

\*Corresponding authors: Denglb@szu.edu.cn; pxzhang@szu.edu.cn

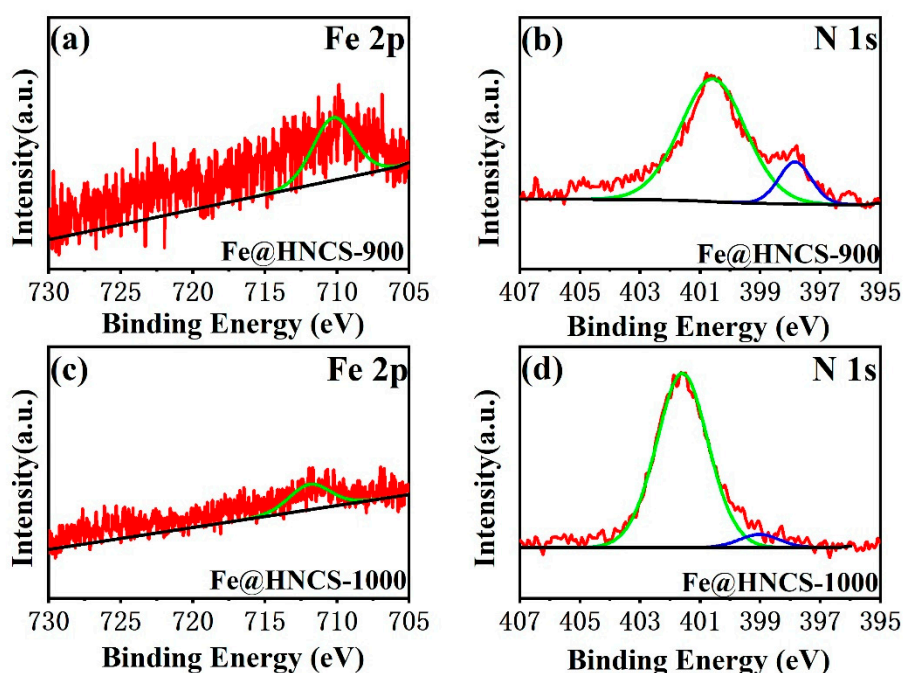

Fig. S1 High resolution XPS spectra of (a) Fe 2p, (b) N 1s for Fe@HNCS-900, (c) Fe 2p and (d) N 1s for Fe@HNCS-1000.

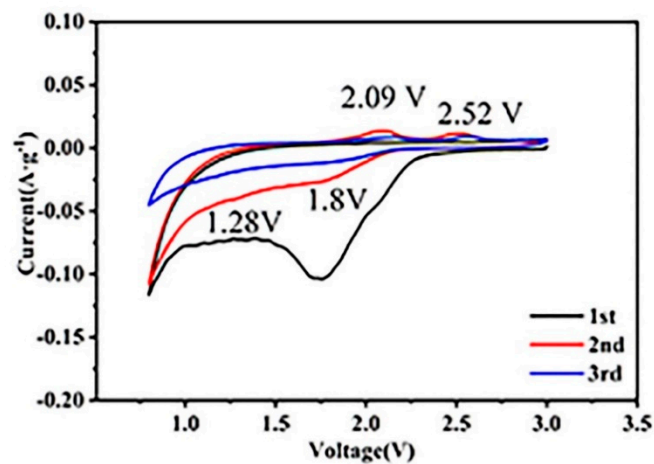

Fig. S2 CV curves of Fe@CNS-800

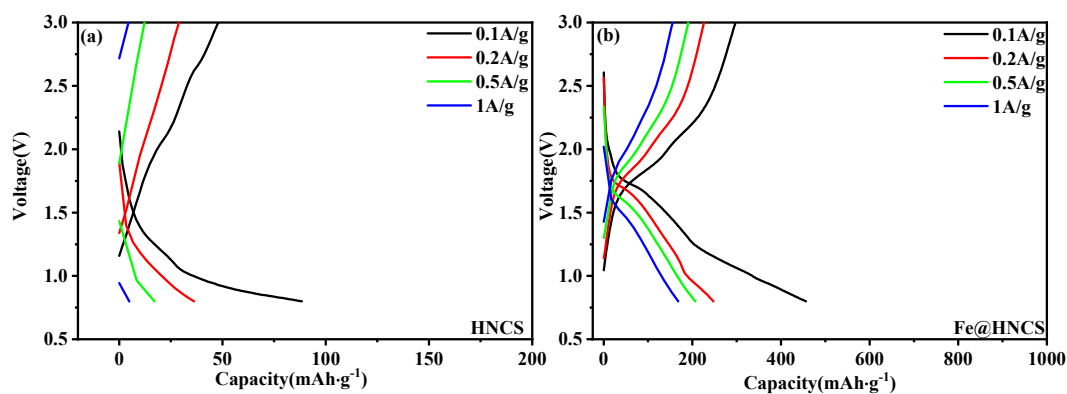

Fig. S3 GCD profiles of (a) HNCS, (b) Fe@HNCS-800 tested at different current densities

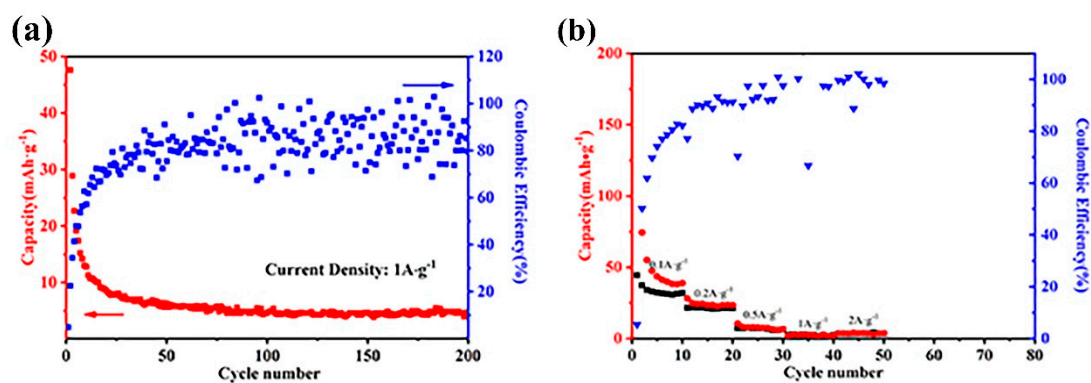

Fig. S4 (a) cyclic performance and (b) rate performance of HNCS.
